# Supplementary material for: Co (II) Complexes Based on the Bis-Pyrazol-S-Triazine Pincer Ligand: Synthesis, X-ray Structure Studies, and Cytotoxic Evaluation
Source: MDPI journal article supplement (doi:10.3390/cryst12050741), 2022-05-20
Supplement: s1 [file s1]

Archive with 1 entries (1 files):
- crystals-1730535-supplementary.pdf
